# Supplementary material
Source: HighWire-hosted journal article supplement (https://bmjopenquality.bmj.com/highwire/filestream/136219/field_highwire_adjunct_files/2/ds4123.docx)
Supplement: ds4123.docx [file ds4123.docx]

Figure 1 – Feedback from A&E Staff following the introduction of the pilot study

*Figure 1: Clearly demonstrates a positive response to the introduction of the pilot system.*

Figure 2: Graph comparing the number of times key pieces of information were recorded pre & post intervention.


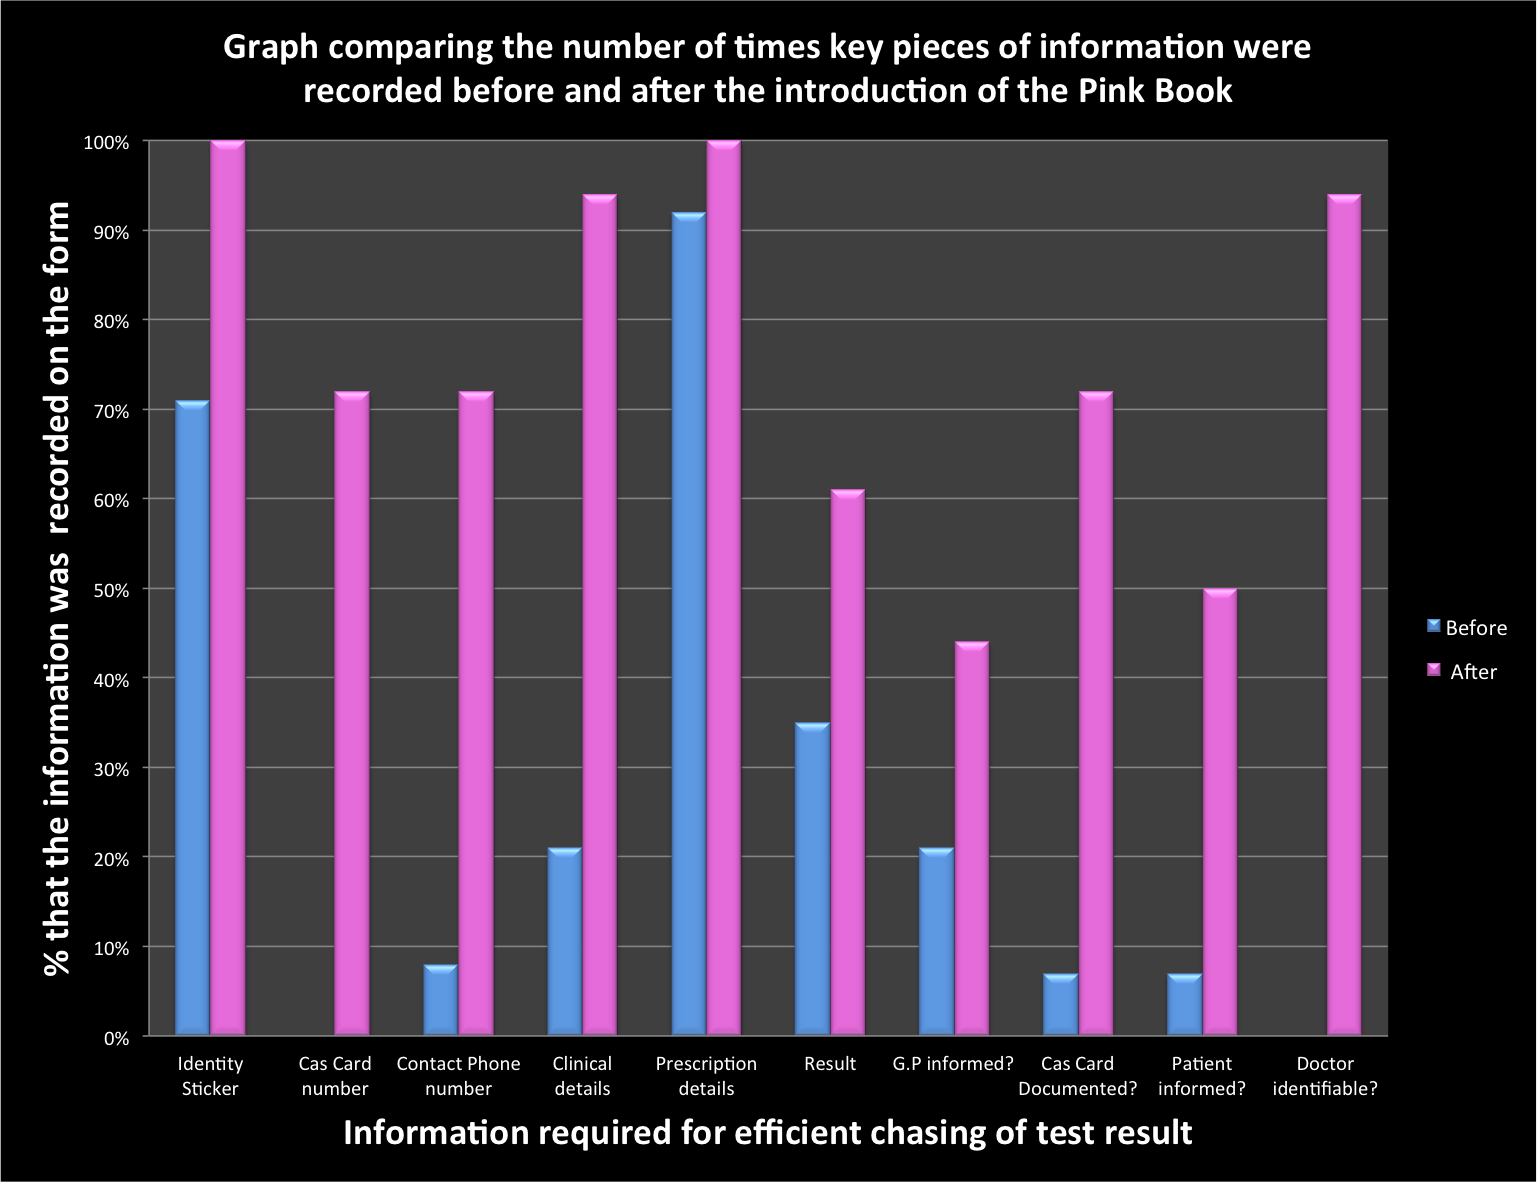


*Figure 2: Clearly demonstrates the greater quantity and quality of information recorded in all 10 areas of assessment once the Pink Book was in introduced*

**Example of Pink book proforma**

**REPORT ALL POSITIVE RESULTS TO GP**

**DOCUMENT ALL POSITIVE RESULTS IN CAS CARD**

| Patient Details: (Sticky)  Name:  DOB:  Hosp Number: | GP Phone Number:  Cas Card Number: | |
| --- | --- | --- |
| Clinical details:  Sample taken:  Prescription given:  Signature:  Admitted / discharged? Name:  Date: | | |
| Results:  Action taken: | | |
| GP informed: Y / N Parents informed: Y / N  Cas card documented: Y / N  Completed: | | Signature:  Name:  Date: |
